CORRECTION

# Correction: Ammonia Oxidizers in a Pilot-Scale Multilayer Rapid Infiltration System for Domestic Wastewater Treatment

The *PLOS ONE* Staff

There are errors in the author affiliations. The affiliations should appear as shown here:

Yingli Lian<sup>1,2</sup>, Meiyong Xu<sup>2, 4\*</sup>, Yuming Zhong<sup>2,4</sup>, Yongqiang Yang<sup>3</sup>, Fanrong Chen<sup>3</sup>, Jun Guo<sup>2,4</sup>

1. School of Biological Science & Engineering, South China University of Technology, Guangzhou, 510006, China.

2. Guangdong Provincial Key Laboratory of Microbial Culture Collection, Guangdong Institute of Microbiology, Guangzhou, 510070, China.

3. Guangzhou Institute of Geochemistry, Chinese Academy of Sciences, Guangzhou, 510640, China.

4. State Key Laboratory of Applied Microbiology Southern China, Guangzhou, 510070, China.

## Reference

1. Lian Y, Xu M, Zhong Y, Yang Y, Chen F, Guo J (2014) Ammonia Oxidizers in a Pilot-Scale Multilayer Rapid Infiltration System for Domestic Wastewater Treatment. *PLoS ONE* 9(12): e114723. doi:[10.1371/journal.pone.0114723](https://doi.org/10.1371/journal.pone.0114723) PMID: [25479611](https://pubmed.ncbi.nlm.nih.gov/25479611/)

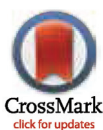

## OPEN ACCESS

**Citation:** The *PLOS ONE* Staff (2015) Correction: Ammonia Oxidizers in a Pilot-Scale Multilayer Rapid Infiltration System for Domestic Wastewater Treatment. *PLoS ONE* 10(2): e0118656. doi:[10.1371/journal.pone.0118656](https://doi.org/10.1371/journal.pone.0118656)

**Published:** February 25, 2015

**Copyright:** © 2015 The PLOS ONE Staff. This is an open access article distributed under the terms of the [Creative Commons Attribution License](https://creativecommons.org/licenses/by/4.0/), which permits unrestricted use, distribution, and reproduction in any medium, provided the original author and source are credited.
